# Supplementary material for: Ultrasound and Histologic Examination after Subcutaneous Injection of Two Volumizing Hyaluronic Acid Fillers: A Preliminary Study
Source: PubMed Central journal article supplement — Plast Reconstr Surg Glob Open. 2017 Feb 24;5(2):e1222. doi: 10.1097/GOX.0000000000001222 (PMC5340479; doi:10.1097/gox.0000000000001222), 2017-02-24
Supplement: gox-5-e1222-s002.pdf [file gox-5-e1222-s002.pdf]

|                          | Right<br>Lateral site       | Right<br>Medial site        | Left<br>Lateral site   | Left<br>Medial site    |
|--------------------------|-----------------------------|-----------------------------|------------------------|------------------------|
| Color/<br>Injections day | Blue<br>Day 0<br>ultrasound | Pink<br>Day 0<br>ultrasound | Black<br>Day 0 Surgery | Green<br>Day 0 Surgery |
| Injected HA gel          | CPM <sup>®</sup>            | Vycross <sup>®</sup>        | CPM <sup>®</sup>       | Vycross <sup>®</sup>   |
