# Supplementary material for: Ultrasound and Histologic Examination after Subcutaneous Injection of Two Volumizing Hyaluronic Acid Fillers: A Preliminary Study
Source: PubMed Central journal article supplement — Plast Reconstr Surg Glob Open. 2017 Feb 24;5(2):e1222. doi: 10.1097/GOX.0000000000001222 (PMC5340479; doi:10.1097/gox.0000000000001222), 2017-02-24
Supplement: gox-5-e1222-s005.pdf [file gox-5-e1222-s005.pdf]

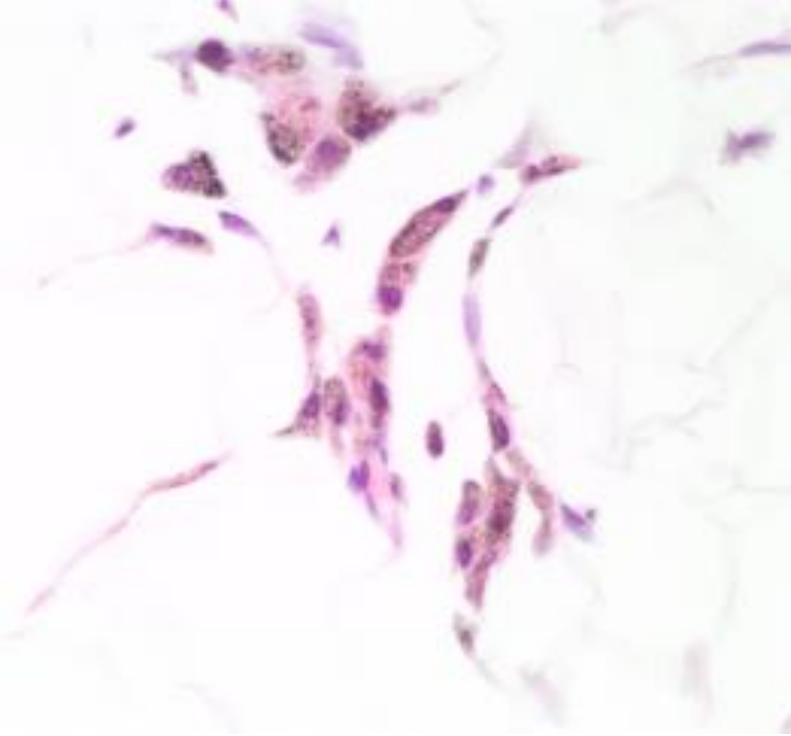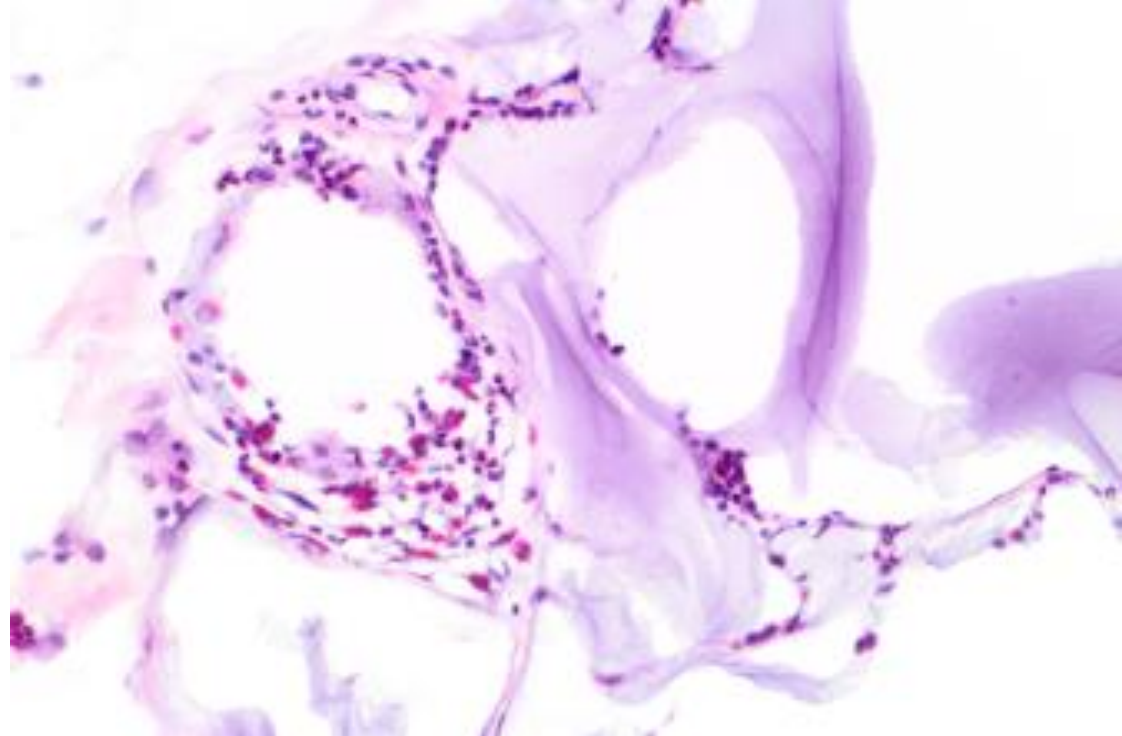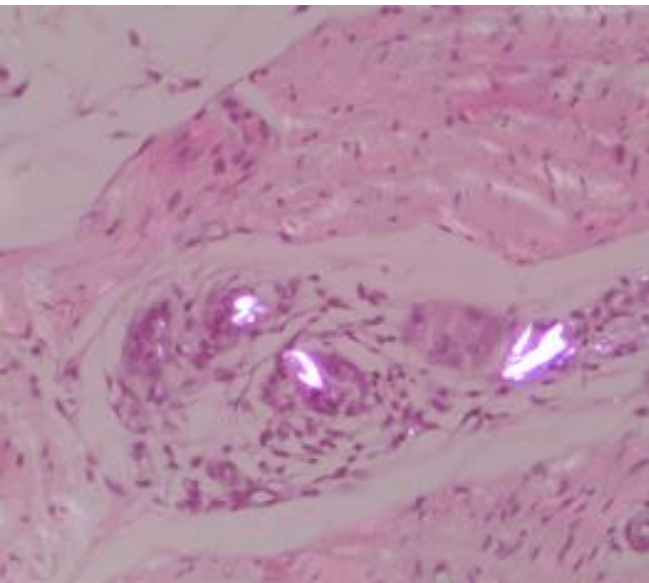

D0 Above: Left: black China ink tattoo (X 200). Right: red China ink tattoo (X100).

Below: Bi-refringent foreign bodies in the fat, polarised light (X100).
