# Supplementary figures and images for: Ultrasound and Histologic Examination after Subcutaneous Injection of Two Volumizing Hyaluronic Acid Fillers: A Preliminary Study
Source: PubMed Central journal article supplement — Plast Reconstr Surg Glob Open. 2017 Feb 24;5(2):e1222. doi: 10.1097/GOX.0000000000001222 (PMC5340479; doi:10.1097/gox.0000000000001222), 2017-02-24

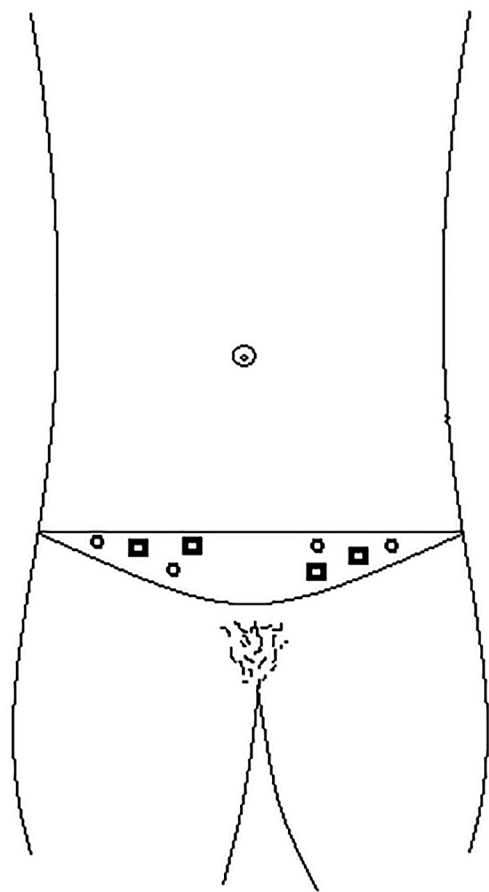

Supplement: gox-5-e1222-s001.pdf [file gox-5-e1222-s001.pdf]

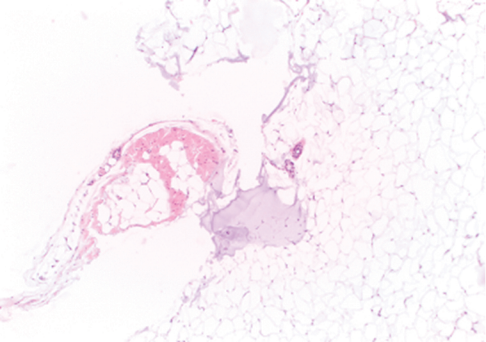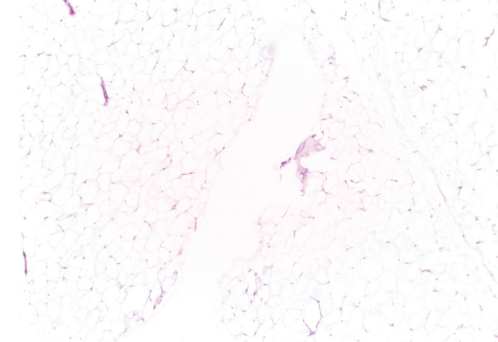

Supplement: gox-5-e1222-s003.pdf [file gox-5-e1222-s003.pdf]

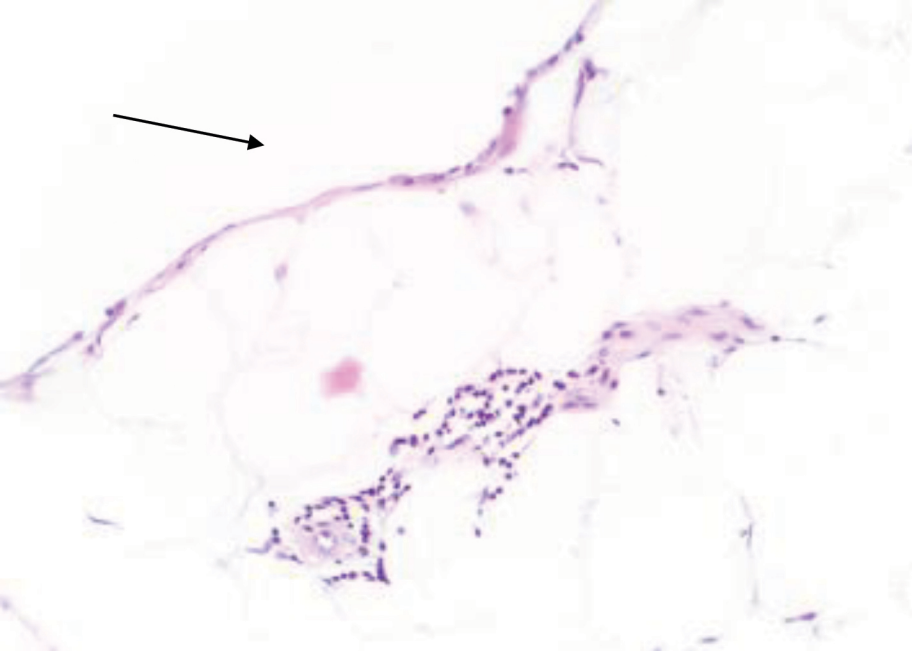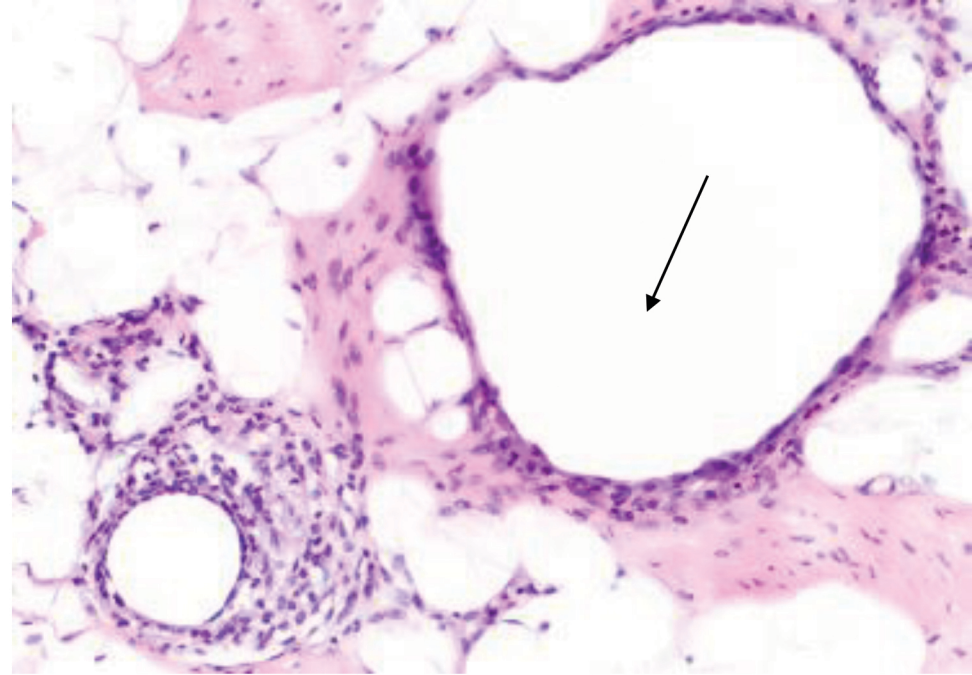

Supplement: gox-5-e1222-s004.pdf [file gox-5-e1222-s004.pdf]
